# Supplementary material for: Molecular control of ionic conduction in polymer nanopores
Source: Royal Society of Chemistry journal article supplement (doi:10.1039/b906279n), 2009-01-01
Supplement: b906279n.pdf [file b906279n.pdf]

## Supplementary data

Atomic coordinates for PET monomers as well as topology and parameter files needed to perform MD simulations of PET polymers are provided. Topology files can be used to generate PET polymers with the plugin *psfgen* available in the VMD program (1). Parameter files comply with the functional form of CHARMM force field (2).

(1) W. Humphrey *et al.*, *J. Mol. Graphics*, 1996, **14**, 3338.

(2) A. MacKerell Jr. *et al.*, *J. Phys. Chem. B*, 1998, **102**, 35863616.

## PET atomic model

**Figure S1.** The figure shows the CHARMM compound models (a) benzene, (b) deprotonated benzoic acid, (c) deprotonated acetic acid, (d) protonated acetic acid, and (e) propane-1,2-diyl diacetate. These compound models were used to build models for (f) PET monomer, (g) juncture between PET monomers, (h) protonated terminal residues, and (i) deprotonated terminal residues. CHARMM abbreviations are shown in parenthesis.

### Compound models from CHARMM force field

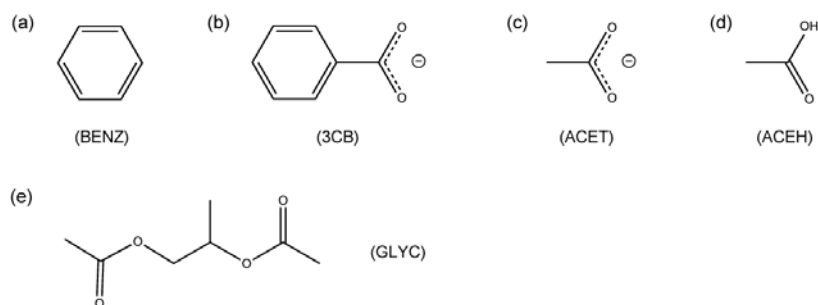

### PET topology

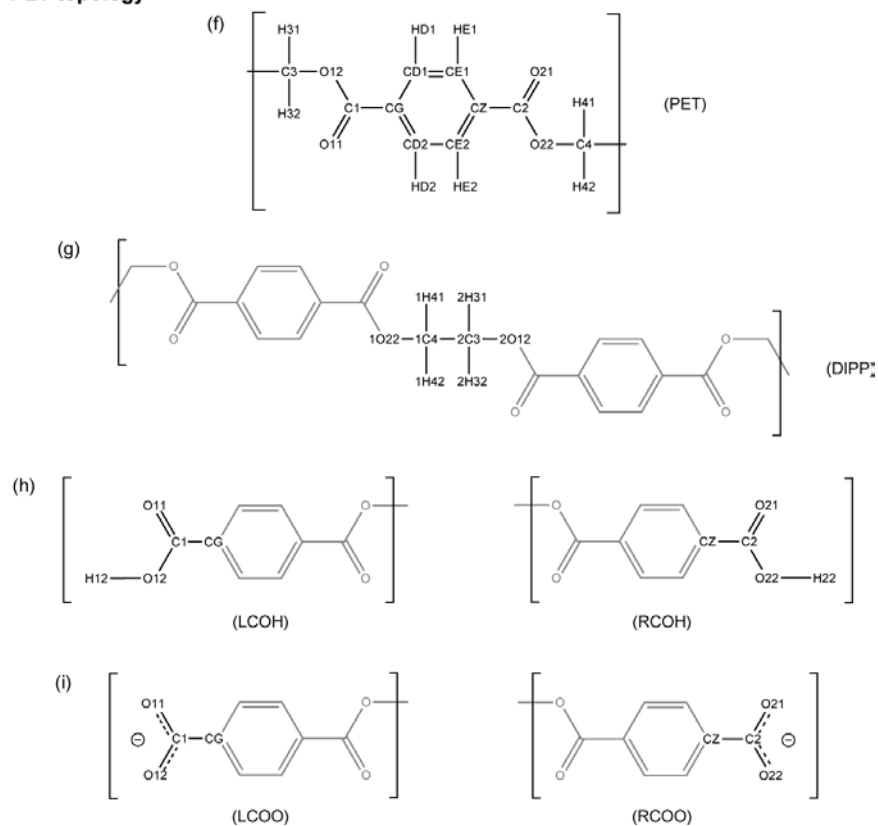

## Atomic coordinates for PET monomer

---

|        |                                                   |     |     |   |        |        |         |        |      |      |    |   |
|--------|---------------------------------------------------|-----|-----|---|--------|--------|---------|--------|------|------|----|---|
| REMARK | Coordinates for PET monomer in TRANS conformation |     |     |   |        |        |         |        |      |      |    |   |
| REMARK | For CIS isomer, change the following coordinates  |     |     |   |        |        |         |        |      |      |    |   |
| REMARK | O12                                               |     |     |   | 27.653 | -4.733 | 0.000   |        |      |      |    |   |
| REMARK | O11                                               |     |     |   | 30.840 | -4.733 | 0.000   |        |      |      |    |   |
| REMARK | C3                                                |     |     |   | 27.653 | -2.893 | 0.000   |        |      |      |    |   |
| REMARK | H31                                               |     |     |   | 28.223 | -2.564 | 0.931   |        |      |      |    |   |
| REMARK | H32                                               |     |     |   | 28.107 | -2.564 | -1.012  |        |      |      |    |   |
|        |                                                   |     |     |   |        |        |         |        |      |      |    |   |
| ATOM   | 1                                                 | CD1 | PET | T | 1      | 30.840 | -8.412  | 0.000  | 1.00 | 0.00 | TR | C |
| ATOM   | 2                                                 | HD1 | PET | T | 1      | 31.794 | -7.862  | 0.000  | 1.00 | 0.00 | TR | H |
| ATOM   | 3                                                 | CE1 | PET | T | 1      | 30.840 | -10.252 | 0.000  | 1.00 | 0.00 | TR | C |
| ATOM   | 4                                                 | HE1 | PET | T | 1      | 31.794 | -10.803 | 0.000  | 1.00 | 0.00 | TR | H |
| ATOM   | 5                                                 | CD2 | PET | T | 1      | 27.653 | -8.412  | 0.000  | 1.00 | 0.00 | TR | C |
| ATOM   | 6                                                 | HD2 | PET | T | 1      | 26.699 | -7.862  | 0.000  | 1.00 | 0.00 | TR | H |
| ATOM   | 7                                                 | CE2 | PET | T | 1      | 27.653 | -10.252 | 0.000  | 1.00 | 0.00 | TR | C |
| ATOM   | 8                                                 | HE2 | PET | T | 1      | 26.699 | -10.803 | 0.000  | 1.00 | 0.00 | TR | H |
| ATOM   | 9                                                 | CG  | PET | T | 1      | 29.246 | -7.492  | 0.000  | 1.00 | 0.00 | TR | C |
| ATOM   | 10                                                | C1  | PET | T | 1      | 29.246 | -5.653  | 0.000  | 1.00 | 0.00 | TR | C |
| ATOM   | 11                                                | O12 | PET | T | 1      | 30.840 | -4.733  | 0.000  | 1.00 | 0.00 | TR | O |
| ATOM   | 12                                                | O11 | PET | T | 1      | 27.653 | -4.733  | 0.000  | 1.00 | 0.00 | TR | O |
| ATOM   | 13                                                | C3  | PET | T | 1      | 30.840 | -2.893  | 0.000  | 1.00 | 0.00 | TR | C |
| ATOM   | 14                                                | H31 | PET | T | 1      | 31.700 | -2.564  | 0.931  | 1.00 | 0.00 | TR | H |
| ATOM   | 15                                                | H32 | PET | T | 1      | 31.700 | -2.564  | -1.012 | 1.00 | 0.00 | TR | H |
| ATOM   | 16                                                | CZ  | PET | T | 1      | 29.246 | -11.172 | 0.000  | 1.00 | 0.00 | TR | C |
| ATOM   | 17                                                | C2  | PET | T | 1      | 29.246 | -13.012 | 0.000  | 1.00 | 0.00 | TR | C |
| ATOM   | 18                                                | O21 | PET | T | 1      | 30.840 | -13.932 | 0.000  | 1.00 | 0.00 | TR | O |
| ATOM   | 19                                                | O22 | PET | T | 1      | 27.653 | -13.932 | 0.000  | 1.00 | 0.00 | TR | O |
| ATOM   | 20                                                | C4  | PET | T | 1      | 27.653 | -15.772 | 0.000  | 1.00 | 0.00 | TR | C |
| ATOM   | 21                                                | H41 | PET | T | 1      | 27.153 | -16.101 | 0.931  | 1.00 | 0.00 | TR | H |
| ATOM   | 22                                                | H42 | PET | T | 1      | 27.153 | -16.034 | -1.012 | 1.00 | 0.00 | TR | H |

---

## PET topology

\* <CHARMM22 topology file for PET>

27 1

---

|      |    |      |        |   |                                                  |
|------|----|------|--------|---|--------------------------------------------------|
| MASS | 1  | H    | 1.008  | H | ! nonpolar H                                     |
| MASS | 2  | HAL2 | 1.008  | H | ! nonpolar H                                     |
| MASS | 3  | HP   | 1.008  | H | ! aromatic H                                     |
| MASS | 4  | CAP  | 12.011 | C | ! aromatic C                                     |
| MASS | 5  | CC   | 12.011 | C | ! carbonyl C, asn,asp,gln,glu,cter,ct2           |
| MASS | 6  | CD   | 12.011 | C | ! carbonyl C, pres aspp,glup,ct1                 |
| MASS | 7  | CL   | 12.011 | C | ! carbonyl C (acetic acid/methyl acetate)        |
| MASS | 8  | CTL2 | 12.011 | C | ! aliphatic sp3 C for CH2                        |
| MASS | 9  | OC   | 15.999 | O | ! carboxylate oxygen                             |
| MASS | 10 | OB   | 15.999 | O | ! carbonyl oxygen in acetic acid                 |
| MASS | 11 | OBL  | 15.999 | O | ! acetic acid carboxyl oxygen (e. to protein OB) |
| MASS | 12 | OH1  | 15.999 | O | ! hydroxyl oxygen                                |
| MASS | 13 | OSL  | 15.999 | O | ! ester oxygen                                   |

AUTO ANGLES DIHE

---

| <b>RESI PET</b> |        | 0.0  | ! topology for PET |     |     |     |
|-----------------|--------|------|--------------------|-----|-----|-----|
| GROUP           |        |      |                    |     |     |     |
| ATOM            | CD1    | CAP  | -0.115             |     |     |     |
| ATOM            | HD1    | HP   | 0.115              |     |     |     |
| GROUP           |        |      |                    |     |     |     |
| ATOM            | CE1    | CAP  | -0.115             |     |     |     |
| ATOM            | HE1    | HP   | 0.115              |     |     |     |
| GROUP           |        |      |                    |     |     |     |
| ATOM            | CD2    | CAP  | -0.115             |     |     |     |
| ATOM            | HD2    | HP   | 0.115              |     |     |     |
| GROUP           |        |      |                    |     |     |     |
| ATOM            | CE2    | CAP  | -0.115             |     |     |     |
| ATOM            | HE2    | HP   | 0.115              |     |     |     |
| GROUP           |        |      |                    |     |     |     |
| ATOM            | CG     | CAP  | 0.10               |     |     |     |
| ATOM            | C1     | CL   | 0.63               |     |     |     |
| ATOM            | O11    | OBL  | -0.52              |     |     |     |
| ATOM            | O12    | OSL  | -0.34              |     |     |     |
| ATOM            | C3     | CTL2 | -0.05              |     |     |     |
| ATOM            | H31    | HAL2 | 0.09               |     |     |     |
| ATOM            | H32    | HAL2 | 0.09               |     |     |     |
| GROUP           |        |      |                    |     |     |     |
| ATOM            | CZ     | CAP  | 0.10               |     |     |     |
| ATOM            | C2     | CL   | 0.63               |     |     |     |
| ATOM            | O21    | OBL  | -0.52              |     |     |     |
| ATOM            | O22    | OSL  | -0.34              |     |     |     |
| ATOM            | C4     | CTL2 | -0.05              |     |     |     |
| ATOM            | H41    | HAL2 | 0.09               |     |     |     |
| ATOM            | H42    | HAL2 | 0.09               |     |     |     |
| BOND            | C3     | H31  | C3                 | H32 | C3  | O12 |
| BOND            | O12    | C1   | C1                 | CG  |     |     |
| BOND            | C4 H41 | C4   | H42                | C4  | O22 |     |
| BOND            | O22    | C2   | C2                 | CZ  |     |     |
| BOND            | CD1    | HD1  | CD2                | HD2 |     |     |
| BOND            | CE1    | HE1  | CE2                | HE2 |     |     |
| BOND            | CD1    | CE1  | CG                 | CD2 | CE2 | CZ  |
| DOUBLE          | O11    | C1   | C2                 | O21 |     |     |
| DOUBLE          | CG     | CD1  | CE1                | CZ  | CD2 | CE2 |
| IMPR            | C1     | CG   | O12                | O11 |     |     |
| IMPR            | C2     | CZ   | O22                | O21 |     |     |

---

**PRES DIPP** 0.0 ! patch for two PET molecules. Patch must be 1-PET and 2-PET  
 ! use in a patch statement  
 ! follow with AUTOgenerate ANGLEs DIHEdrals command

BOND 1C4 2C3  
 ANGLE 1H41 1C4 2C3 1H42 1C4 2C3  
 ANGLE 2H31 2C3 1C4 2H32 2C3 1C4  
 ANGLE 2O12 2C3 1C4 1O22 1C4 2C3  
 DIHE 1H41 1C4 2C3 2H31  
 DIHE 1H41 1C4 2C3 2H32  
 DIHE 1H41 1C4 2C3 2O12  
 DIHE 1O22 1C4 2C3 2H31  
 DIHE 1O22 1C4 2C3 2H32  
 DIHE 1O22 1C4 2C3 2O12  
 DIHE 1H42 1C4 2C3 2H31  
 DIHE 1H42 1C4 2C3 2H32  
 DIHE 1H42 1C4 2C3 2O12

---

**PRES LCOH** 0.0 ! protonated carboxyl group

GROUP  
 ATOM C1 CD 0.75  
 ATOM O11 OB -0.55  
 ATOM O12 OH1 -0.61  
 ATOM CG CAP -0.03  
 ATOM H12 H 0.44  
 DELETE ATOM H31  
 DELETE ATOM H32  
 DELETE ATOM C3  
 BOND O12 H12  
 ANGLE H12 O12 C1  
 DIHE H12 O12 C1 O11  
 DIHE H12 O12 C1 CG  
 IC H12 O12 C1 O11 0.0000 0.0000 0.0000 0.0000 0.0000

---

**PRES RCOH** 0.0 ! protonated carboxyl group

GROUP  
 ATOM C2 CD 0.75  
 ATOM O21 OB -0.55  
 ATOM O22 OH1 -0.61  
 ATOM CZ CAP -0.03  
 ATOM H22 H 0.44  
 DELETE ATOM H41  
 DELETE ATOM H42  
 DELETE ATOM C4  
 BOND O22 H22  
 ANGLE H22 O22 C2  
 DIHE H22 O22 C2 O21  
 DIHE H22 O22 C2 CZ  
 IC H22 O22 C2 O21 0.0000 0.0000 0.0000 0.0000 0.0000

---

---

|                  |      |      |                               |
|------------------|------|------|-------------------------------|
| <b>PRES LCOO</b> |      | -1.0 | ! deprotonated carboxyl group |
| GROUP            |      |      |                               |
| ATOM             | C1   | CC   | 0.62                          |
| ATOM             | O11  | OC   | -0.76                         |
| ATOM             | O12  | OC   | -0.76                         |
| ATOM             | CG   | CAP  | -0.10                         |
| DELETE           | ATOM | H31  |                               |
| DELETE           | ATOM | H32  |                               |
| DELETE           | ATOM | C3   |                               |

---

---

|                  |      |      |                               |
|------------------|------|------|-------------------------------|
| <b>PRES RCOO</b> |      | -1.0 | ! deprotonated carboxyl group |
| GROUP            |      |      |                               |
| ATOM             | C2   | CC   | 0.62                          |
| ATOM             | O21  | OC   | -0.76                         |
| ATOM             | O22  | OC   | -0.76                         |
| ATOM             | CZ   | CAP  | -0.10                         |
| DELETE           | ATOM | H41  |                               |
| DELETE           | ATOM | H42  |                               |
| DELETE           | ATOM | C4   |                               |

---

## PET parameters

---

### BONDS

$$!V(\text{bond}) = Kb(b - b0)**2$$

$$!Kb: \text{kcal/mole/\AA}**2$$

$$!b0: \text{\AA}$$

| atom types |      | Kb      | b0     |             |
|------------|------|---------|--------|-------------|
| CAP        | CAP  | 370.000 | 1.3600 | ! from 3CB  |
| CAP        | HP   | 340.000 | 1.0800 | ! from 3CB  |
| CAP        | CC   | 200.000 | 1.5000 | ! from 3CB  |
| CAP        | CD   | 200.000 | 1.5000 | ! from 3CB  |
| CAP        | CL   | 200.000 | 1.5000 | ! from 3CB  |
| CC         | OC   | 525.000 | 1.2600 | ! from ACET |
| CD         | OB   | 750.000 | 1.2200 | ! from ACEH |
| CD         | OH1  | 230.000 | 1.4000 | ! from ACEH |
| CL         | OBL  | 750.000 | 1.2200 | ! from GLYC |
| CL         | OSL  | 150.000 | 1.3340 | ! from GLYC |
| CTL2       | CTL2 | 222.500 | 1.5300 | ! from GLYC |
| CTL2       | HAL2 | 309.000 | 1.1110 | ! from GLYC |
| CTL2       | OSL  | 340.000 | 1.4300 | ! from GLYC |
| H          | OH1  | 545.000 | 0.9600 | ! from ACEH |

---



---

**ANGLES**

!V(angle) = Ktheta(Theta - Theta0)\*\*2

!Ktheta: kcal/mole/rad\*\*2

!Theta0: degrees

!Kub: kcal/mole/A\*\*2 (Urey-Bradley)

!S0: A

| !atom types |      |      | Ktheta  | Theta0 | Kub    | S0      |             |
|-------------|------|------|---------|--------|--------|---------|-------------|
| CAP         | CAP  | CAP  | 90.00   | 122.00 | 30.00  | 2.38800 | ! from 3CB  |
| CAP         | CAP  | HP   | 30.00   | 119.00 | 22.00  | 2.15250 | ! from 3CB  |
| CAP         | CAP  | CC   | 40.00   | 119.00 | 35.00  | 2.41620 | ! from 3CB  |
| CAP         | CAP  | CD   | 40.00   | 119.00 | 35.00  | 2.41620 | ! from 3CB  |
| CAP         | CAP  | CL   | 40.00   | 119.00 | 35.00  | 2.41620 | ! from 3CB  |
| CAP         | CC   | OC   | 40.00   | 118.00 | 50.00  | 2.38800 | ! from 3CB  |
| CAP         | CD   | OB   | 70.000  | 125.00 | 20.00  | 2.44200 | ! from ACEH |
| CAP         | CD   | OH1  | 55.000  | 110.50 |        |         | ! from ACEH |
| CAP         | CL   | OBL  | 70.000  | 125.00 | 20.00  | 2.44200 | ! from GLYC |
| CAP         | CL   | OSL  | 55.000  | 109.00 | 20.00  | 2.32600 | ! from GLYC |
| CD          | OH1  | H    | 55.000  | 115.00 |        |         | ! from ACEH |
| CL          | OSL  | CTL2 | 40.000  | 109.60 | 30.00  | 2.26510 | ! from GLYC |
| CTL2        | CTL2 | HAL2 | 26.500  | 110.10 | 22.53  | 2.17900 | ! from GLYC |
| CTL2        | CTL2 | OSL  | 75.700  | 110.10 |        |         | ! from GLYC |
| HAL2        | CTL2 | HAL2 | 35.500  | 109.00 | 5.40   | 1.80200 | ! from GLYC |
| HAL2        | CTL2 | OSL  | 60.000  | 109.50 |        |         | ! from GLYC |
| OBL         | CL   | OSL  | 90.000  | 125.90 | 160.00 | 2.25760 | ! from GLYC |
| OB          | CD   | OH1  | 50.000  | 123.00 | 210.00 | 2.26200 | ! from ACEH |
| OC          | CC   | OC   | 100.000 | 124.00 | 70.00  | 2.22500 | ! from ACET |

---

---

## DIHEDRALS

$$!V(\text{dihedral}) = K\text{chi}(1 + \cos(n(\text{chi}) - \text{delta}))$$

!Kchi: kcal/mole

!n: multiplicity

!delta: degrees

!atom types

|      |      |      |      | Kchi | n | delta  |             |
|------|------|------|------|------|---|--------|-------------|
| CAP  | CAP  | CAP  | CAP  | 1.20 | 2 | 180.00 | ! from 3CB  |
| CC   | CAP  | CAP  | CAP  | 3.10 | 2 | 180.00 | ! from 3CB  |
| CD   | CAP  | CAP  | CAP  | 3.10 | 2 | 180.00 | ! from 3CB  |
| CL   | CAP  | CAP  | CAP  | 3.10 | 2 | 180.00 | ! from 3CB  |
| OC   | CC   | CAP  | CAP  | 3.10 | 2 | 180.00 | ! from 3CB  |
| OSL  | CL   | CAP  | CAP  | 3.10 | 2 | 180.00 | ! from 3CB  |
| OBL  | CL   | CAP  | CAP  | 3.10 | 2 | 180.00 | ! from 3CB  |
| OH1  | CD   | CAP  | CAP  | 3.10 | 2 | 180.00 | ! from 3CB  |
| OB   | CD   | CAP  | CAP  | 3.10 | 2 | 180.00 | ! from 3CB  |
| HP   | CAP  | CAP  | CAP  | 4.20 | 2 | 180.00 | ! from 3CB  |
| HP   | CAP  | CAP  | CC   | 4.20 | 2 | 180.00 | ! from 3CB  |
| HP   | CAP  | CAP  | CD   | 4.20 | 2 | 180.00 | ! from 3CB  |
| HP   | CAP  | CAP  | CL   | 4.20 | 2 | 180.00 | ! from 3CB  |
| HP   | CAP  | CAP  | HP   | 1.90 | 2 | 180.00 | ! from 3CB  |
| OBL  | CL   | OSL  | CTL2 | 3.85 | 2 | 180.00 | ! from GLYC |
| X    | CD   | OH1  | X    | 2.05 | 2 | 180.00 | ! from ACEH |
| X    | CL   | OSL  | X    | 2.05 | 2 | 180.00 | ! from GLYC |
| CTL2 | CTL2 | OSL  | CL   | 0.07 | 1 | 180.00 | ! from GLYC |
| X    | CTL2 | OSL  | X    | 0.00 | 3 | 0.00   | ! from GLYC |
| X    | CTL2 | CTL2 | X    | 0.20 | 3 | 0.00   | ! from GLYC |

---



---

## IMPROPERS

$$!V(\text{improper}) = K\text{psi}(\text{psi} - \text{psi0})^{**2}$$

!Kpsi: kcal/mole/rad\*\*2

!psi0: degrees

!note that the second column of numbers (0) is ignored

!atom types

|     |   |   |    | Kpsi   | psi0 |                  |
|-----|---|---|----|--------|------|------------------|
| OC  | X | X | CC | 96.00  | 0    | 0.00 ! from ACET |
| OBL | X | X | CL | 100.00 | 0    | 0.00 ! from GLYC |
| OB  | X | X | CD | 100.00 | 0    | 0.00 ! from ACEH |

---

---

**NONBONDED**

!V(Lennard-Jones) = Eps,i,j[(Rmin,i,j/ri,j)\*\*12 - 2(Rmin,i,j/ri,j)\*\*6]

!epsilon: kcal/mole, Eps,i,j = sqrt(eps,i \* eps,j)

!Rmin/2: A, Rmin,i,j = Rmin/2,i + Rmin/2,j

!atom ignored epsilon Rmin/2 ignored eps,1-4 Rmin/2,1-4

|      |        |         |        |        |         |        |
|------|--------|---------|--------|--------|---------|--------|
| H    | 0.0000 | -0.0460 | 0.2245 |        |         |        |
| HAL2 | 0.0000 | -0.0280 | 1.3400 |        |         |        |
| HP   | 0.0000 | -0.0300 | 1.3582 | 0.0000 | -0.0300 | 1.3582 |
| CAP  | 0.0000 | -0.0700 | 1.9924 |        |         |        |
| CC   | 0.0000 | -0.0700 | 2.0000 |        |         |        |
| CD   | 0.0000 | -0.0700 | 2.0000 |        |         |        |
| CL   | 0.0000 | -0.0700 | 2.0000 |        |         |        |
| CTL2 | 0.0000 | -0.0560 | 2.0100 | 0.0000 | -0.0100 | 1.9000 |
| OC   | 0.0000 | -0.1200 | 1.7000 |        |         |        |
| OB   | 0.0000 | -0.1200 | 1.7000 | 0.0000 | -0.1200 | 1.4000 |
| OBL  | 0.0000 | -0.1200 | 1.7000 | 0.0000 | -0.1200 | 1.4000 |
| OH1  | 0.0000 | -0.1521 | 1.7700 |        |         |        |
| OSL  | 0.0000 | -0.1521 | 1.7700 |        |         |        |

---
